# Supplementary material
Source: PubMed Central journal article supplement (PMC3313622)
Supplement: NIHMS355378-supplement-02.pdf [file NIHMS355378-supplement-02.pdf]

**Supplemental Figure 1**

**A Spleen**

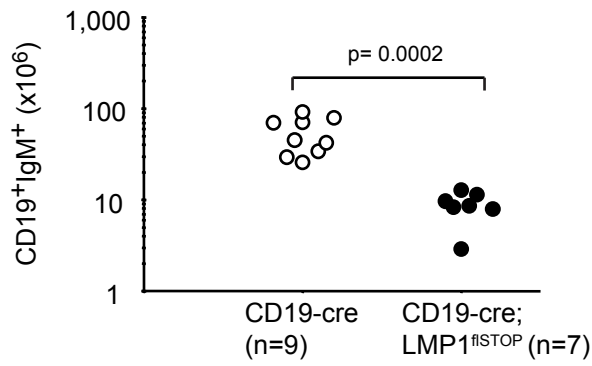

**C Bone marrow**

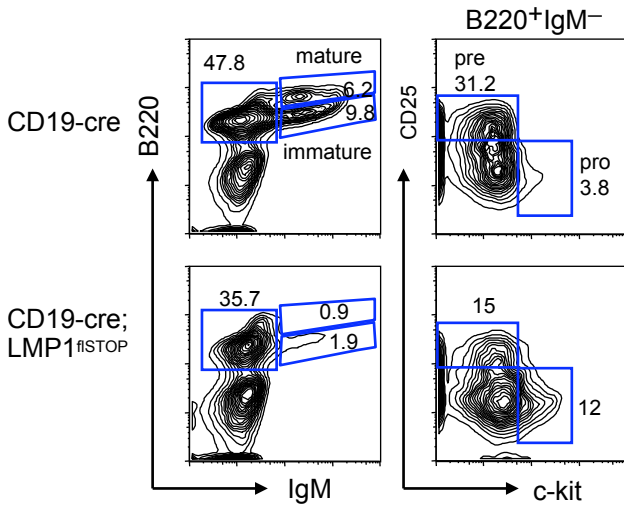

**E Bone marrow**

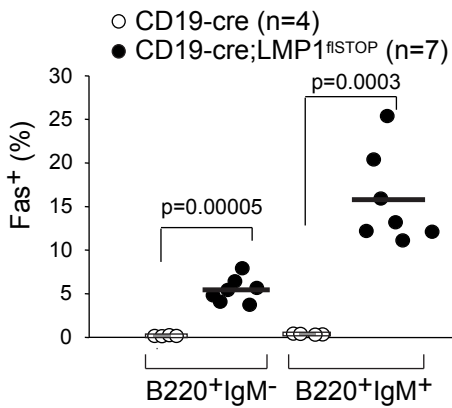

**B**

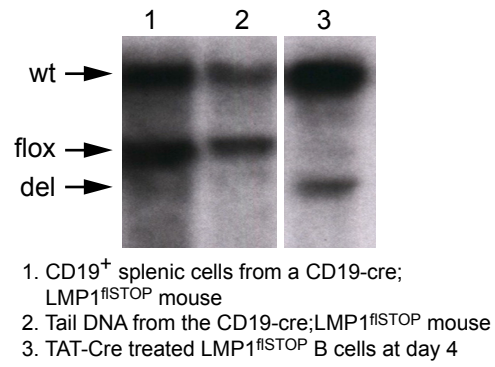

**D Bone marrow**

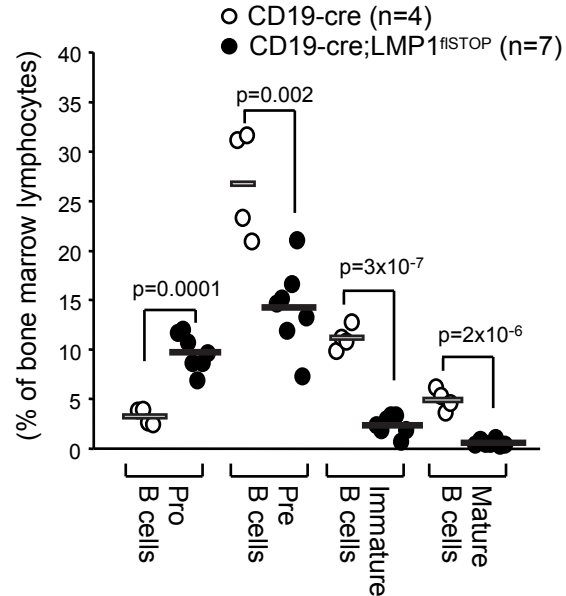

**F Bone marrow**

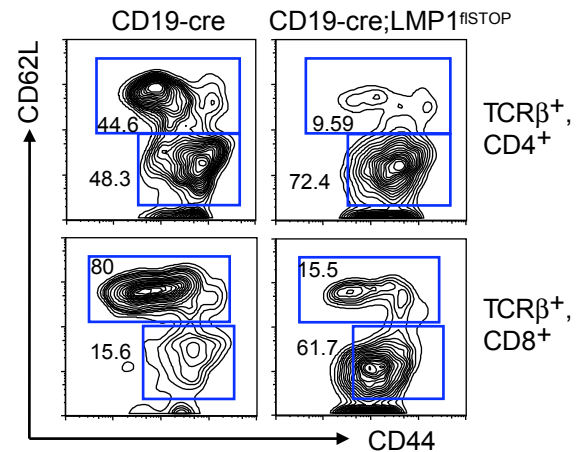

Figure S1  
Zhang et al

**Supplemental Figure 2**

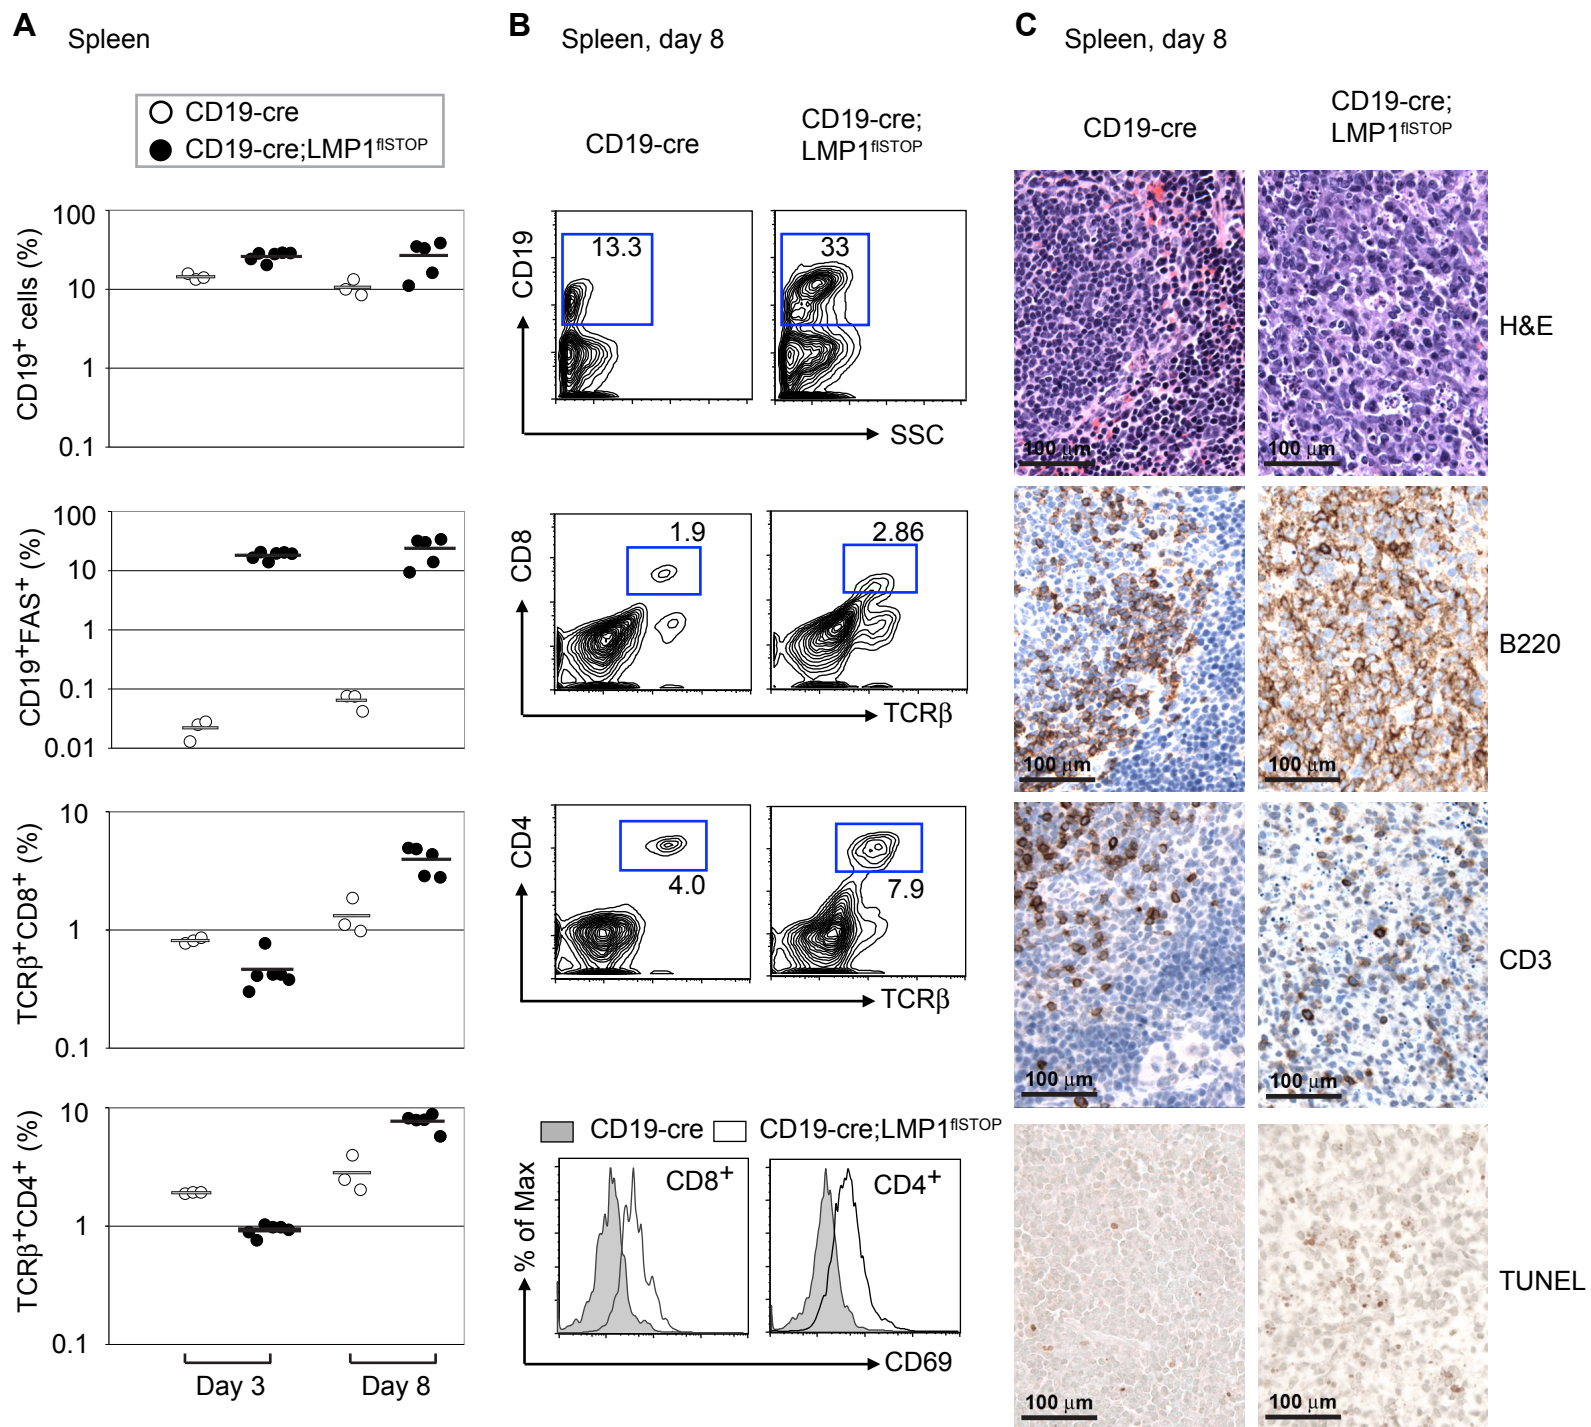

Figure S2  
Zhang et al

### Supplemental Figure 3

○ CD19-cre ● CD19-cre;LMP1<sup>flSTOP</sup>

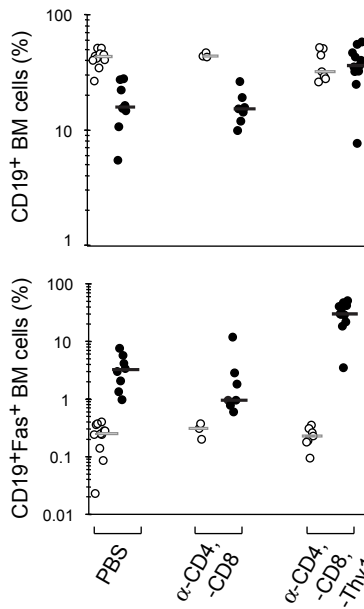

**C**

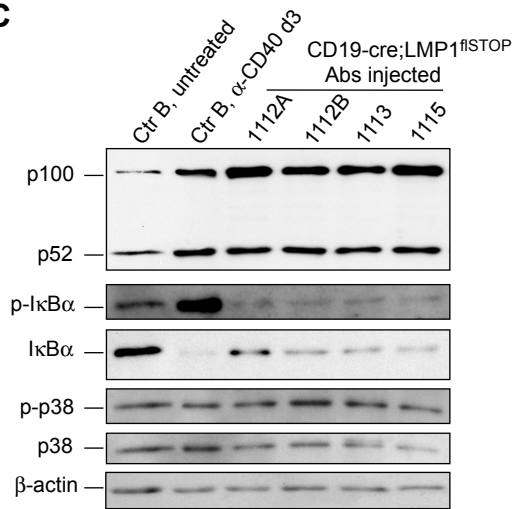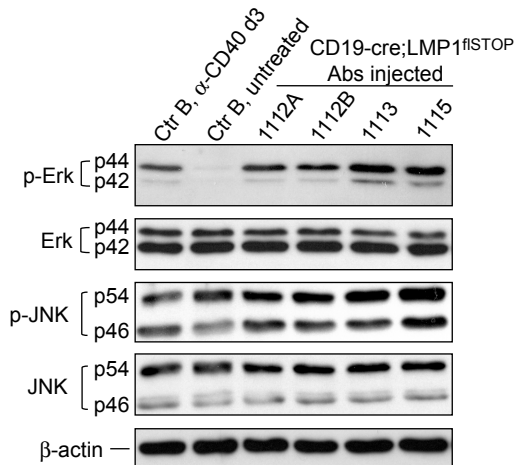

**B**

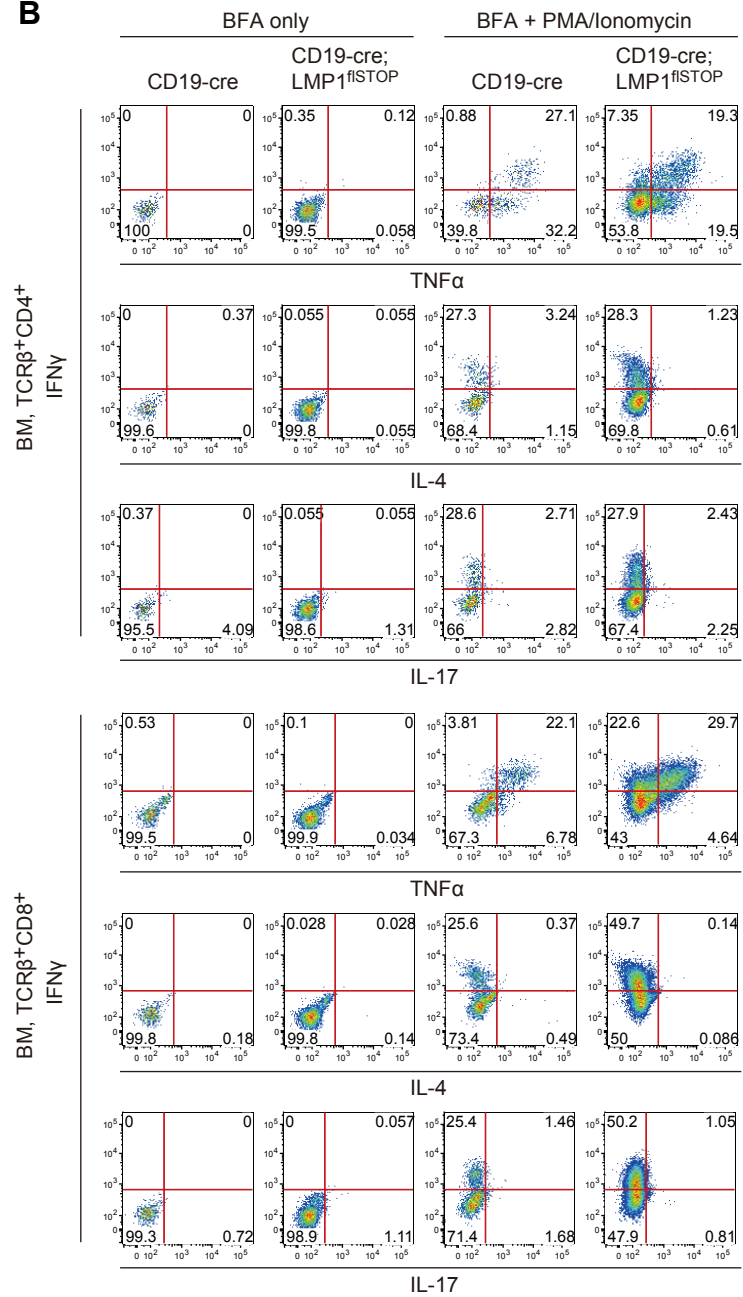

**D**

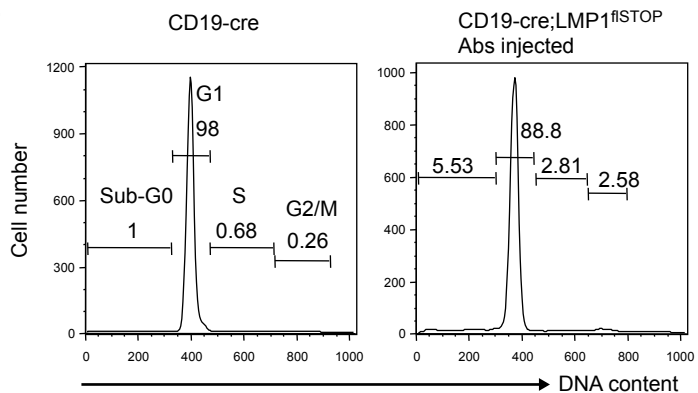

Figure S3  
Zhang et al

Supplemental Figure 4

A

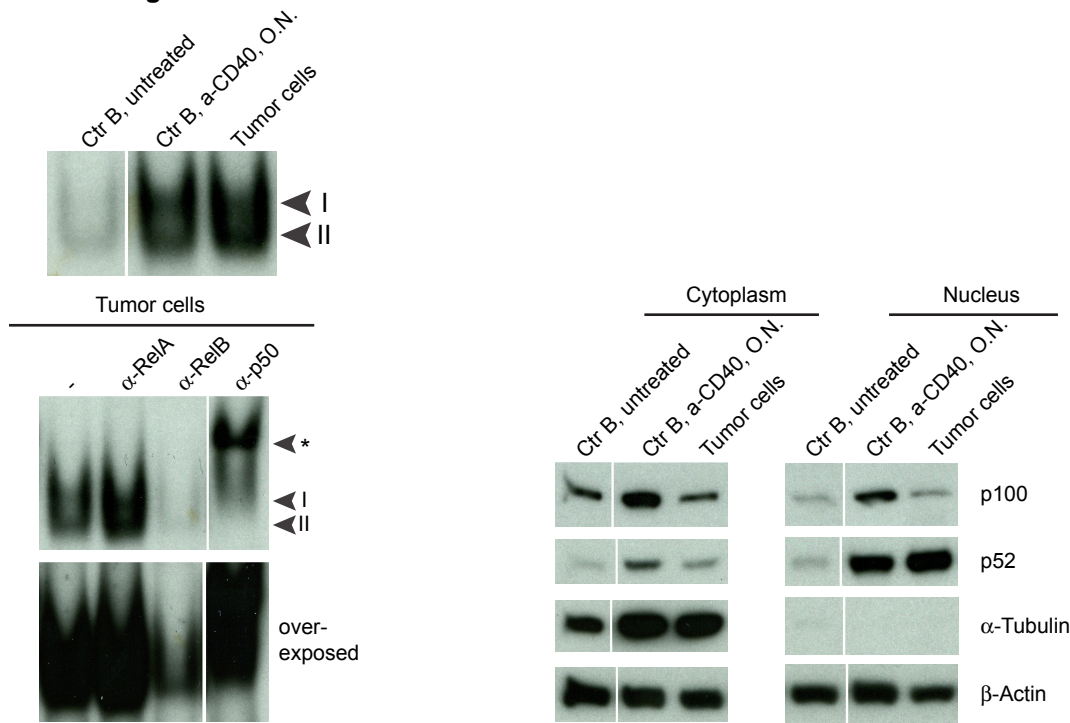

B

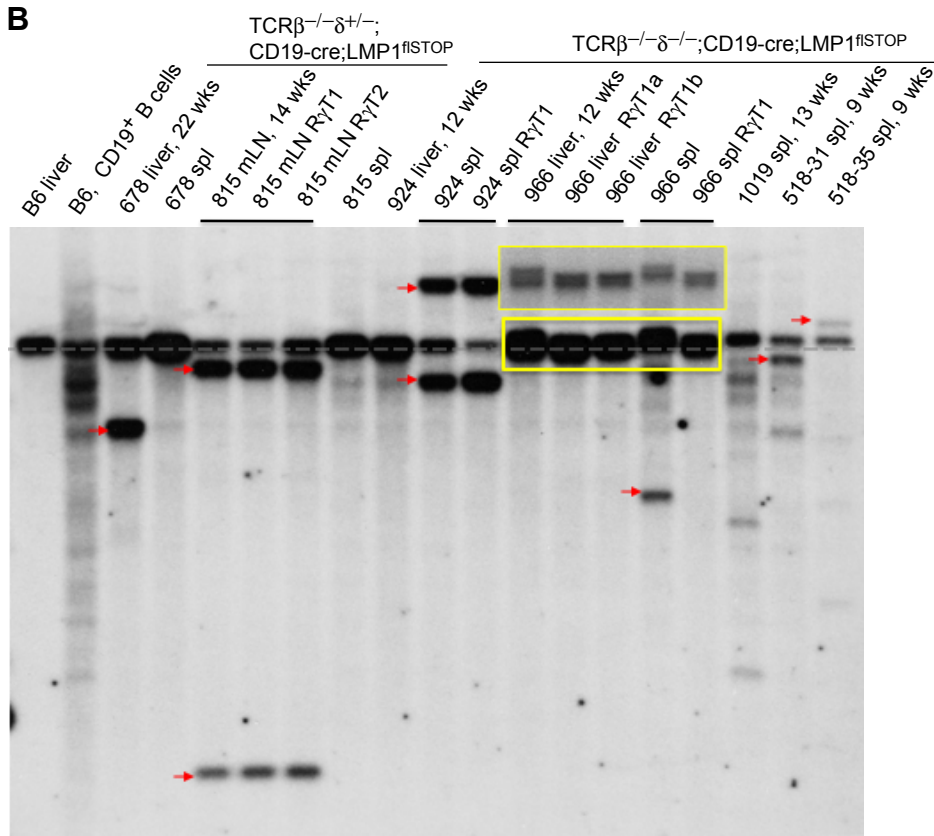

C

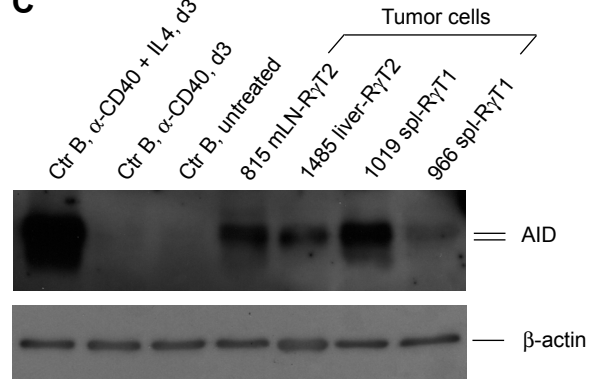

Figure S4  
Zhang et al

**Supplemental Figure 5**

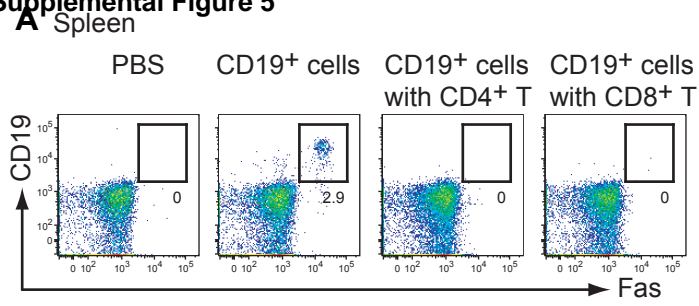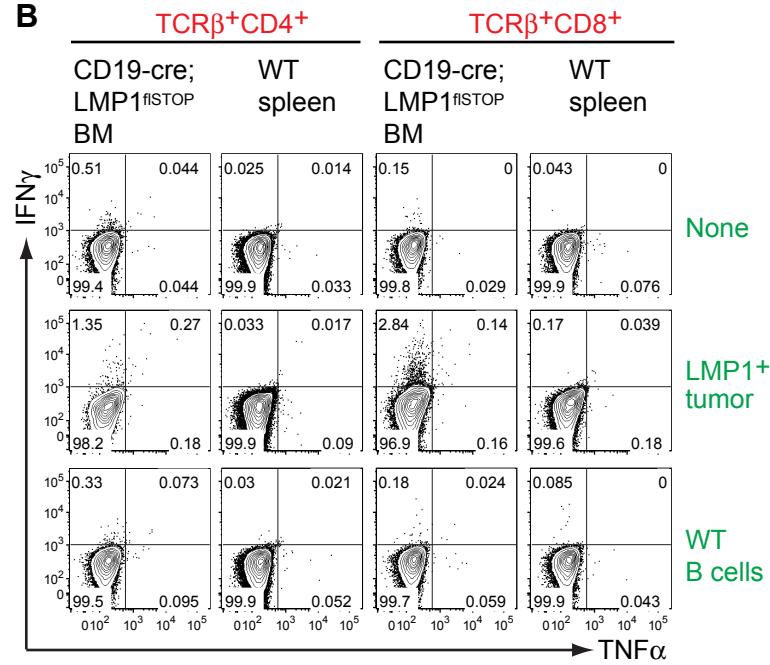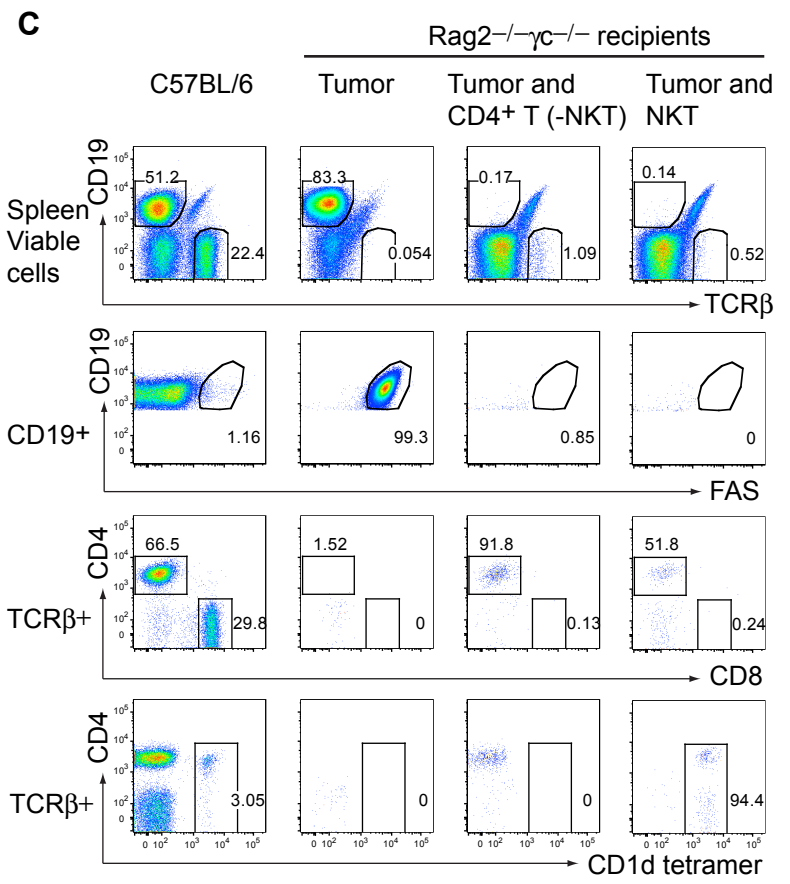

Figure S5  
Zhang et al

**A**

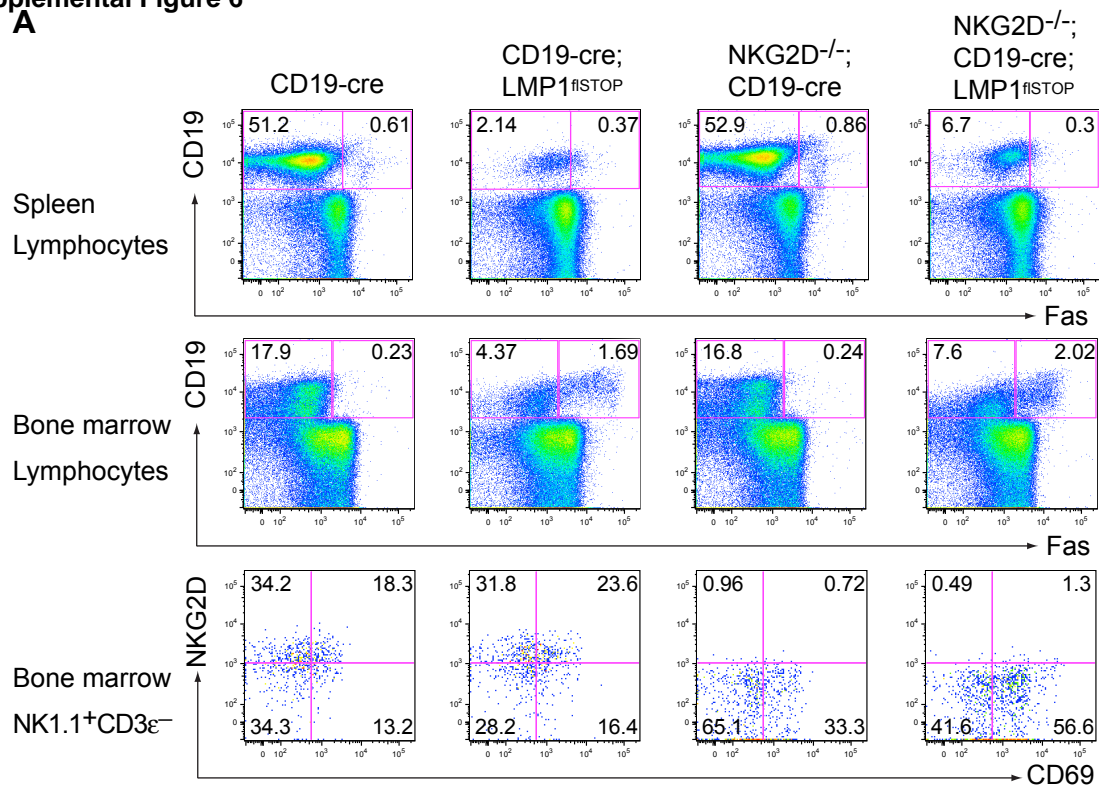

**B**

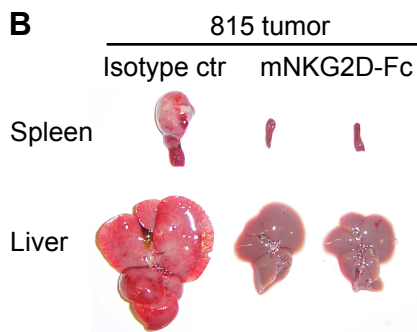

**D**

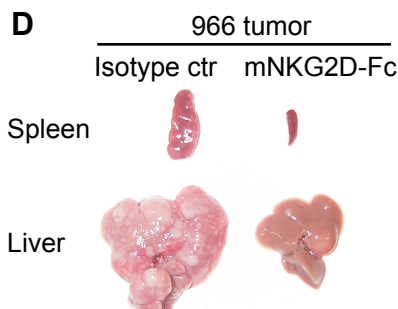

**C**

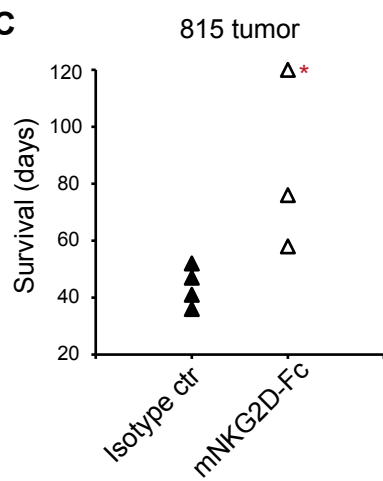

**E**

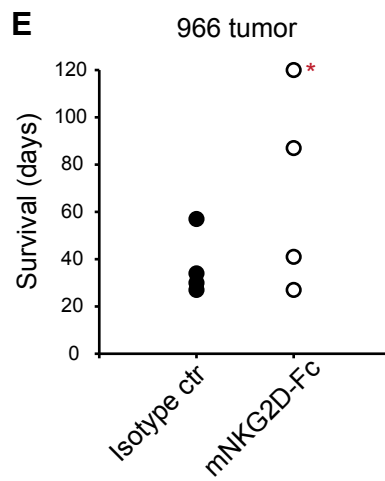

Figure S6  
Zhang et al
